# Supplementary material for: Different Classes of Antidepressants Inhibit the Rat α7 Nicotinic Acetylcholine Receptor by Interacting within the Ion Channel: A Functional and Structural Study
Source: PubMed Central journal article supplement (PMC7918632; doi:10.3390/molecules26040998), 2021-02-13
Supplement: molecules-26-00998-s001.pdf [file molecules-26-00998-s001.pdf]

## Supplementary Material

### Different classes of antidepressants inhibit the rat $\alpha 7$ nicotinic acetylcholine receptor by interacting within the ion channel: a functional and structural study

Yorley Duarte, Maximiliano Rojas, Jonathan Canan, Edwin G. Pérez, Fernando González-Nilo and Jesús García-Colunga.

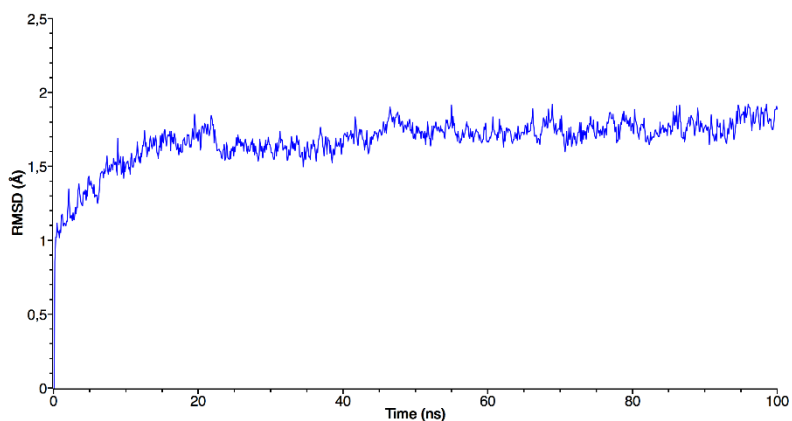

**Supplementary Figure S1.** Last 100 ns of the molecular dynamics of the  $\alpha 7$  nAChR backbone. The RMSD values as a function of time.

**Supplementary Table 1.** Main interactions obtained from XP molecular docking and binding docking score values of the antidepressant in the  $\alpha 7$  nAChR.

| <b>Antidepressant</b> | <b>Contacts with receptor residues</b>                                                    | <b>Docking score (kcal/mol)</b> |
|-----------------------|-------------------------------------------------------------------------------------------|---------------------------------|
| norfloxetine          | <i>Van der Waals:</i><br>L270, I266, T267<br><i>Hydrogen bond:</i><br>S263                | -3.1                            |
| mirtazapine           | <i>Van der Waals:</i><br>L270, S263, T267,<br>I266                                        | -3.1                            |
| imipramine            | <i>Van der Waals:</i><br>L270, T267, I266                                                 | -4.0                            |
| bupropion             | <i>Van der Waals:</i><br>L277, V274<br><i>Hydrogen bond:</i><br>T273                      | -3.0                            |
| fluoxetine            | <i>Van der Waals:</i><br>L270, V274, I266,<br>T267<br><i>Hydrogen bond:</i><br>S263       | -4.4                            |
| venlafaxine           | <i>Van der Waals:</i><br>S263, I266<br><i>Hydrogen bond:</i><br>E260, S263                | -3.8                            |
| citalopram            | <i>Van der Waals:</i><br>L270, T267, V274,<br>I266, S271<br><i>Hydrogen bond:</i><br>T273 | -5.2                            |

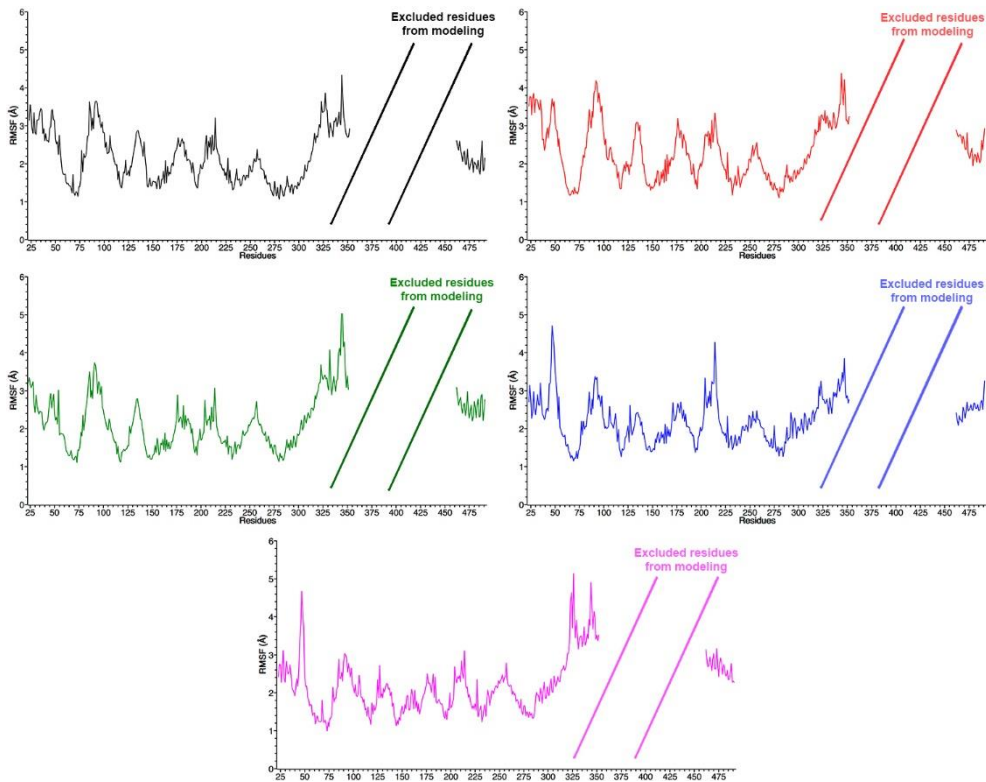

**Supplementary Figure S2.** RMSF plots for each residue of the  $\alpha 7$  nAChR. Bupropion in black, citalopram in red, fluoxetine in green, imipramine in blue and norfluoxetine in pink.

**Supplementary Table 2.** Results for Biological Activity, MMGBSA and molecular docking.

| Antidepressant | Biological Activity<br>( $I_{Ch+AD} / I_{Ch}$ ) | Free energy<br>(MMGBSA)<br>Kcal/mol | Docking XP score<br>Kcal/mol |
|----------------|-------------------------------------------------|-------------------------------------|------------------------------|
| norfloxetine   | $0.823 \pm 0.039$                               | -33.847                             | -3.085                       |
| mirtazapine    | $0.808 \pm 0.021$                               | -33.633                             | -3.07                        |
| imipramine     | $0.743 \pm 0.062$                               | -36.387                             | -3.99                        |
| fluoxetine     | $0.663 \pm 0.058$                               | -40.689                             | -4.429                       |
| venlafaxine    | $0.657 \pm 0.059$                               | -40.749                             | -3.781                       |
| bupropion      | $0.634 \pm 0.036$                               | -37.459                             | -2.96                        |
| escitalopram   | $0.577 \pm 0.061$                               | -52.940                             | -5.213                       |

**Supplementary Table 3.** Amino acid residues that contact with antidepressants.

|      |   |   |   | 2'  |   |   |   | 6'  |   |   | 9'  |   |   |   | 13' |   |   |   | 17' |   |   |   |
|------|---|---|---|-----|---|---|---|-----|---|---|-----|---|---|---|-----|---|---|---|-----|---|---|---|
| ra7  | E | K | I | S   | L | G | I | T   | V | L | L   | S | L | T | V   | F | M | L | L   | V | A | E |
|      |   |   |   | 263 |   |   |   | 267 |   |   | 270 |   |   |   | 274 |   |   |   | 278 |   |   |   |
| norf |   |   |   | x   |   |   |   | x   | x |   | x   |   |   |   |     |   |   |   |     |   |   |   |
| mirt |   |   |   | x   |   |   |   | x   | x |   | x   |   |   |   |     |   |   |   |     |   |   |   |
| imi  |   |   |   |     |   |   |   | x   | x |   | x   |   |   |   |     |   |   |   |     |   |   |   |
| bup  |   |   |   |     |   |   |   |     |   |   |     | x |   | x | x   | x |   | x |     |   |   |   |
| flx  |   |   |   | x   |   |   |   | x   | x |   | x   |   |   |   | x   |   |   |   |     |   |   |   |
| ven  | x |   |   | x   |   |   |   | x   |   |   |     |   |   |   |     |   |   |   |     |   |   |   |
| esc  |   |   |   |     |   |   |   | x   | x |   | x   | x |   | x | x   |   |   |   |     |   |   |   |
